# Supplementary material
Source: PubMed Central journal article supplement (PMC4094196)
Supplement: supp_113.110981_biolreprod.113.110981-1.pdf [file supp_113.110981_biolreprod.113.110981-1.pdf]

Supplemental Table S1. List of genes differentially expressed (Fold Change &gt; 2, adjusted P &lt; 0.05) between 2-cell embryos produced with control and ROS-treated sperm. RPKM: reads per kilobase of transcript model per million mapped reads.

| ENSEMBL Gene ID    | Gene symbol | Gene description                                                   | Control RPKM |
|--------------------|-------------|--------------------------------------------------------------------|--------------|
| ENSMMUG00000007395 | BICD1       | bicaudal D homolog 1 (Drosophila)                                  | 1.812        |
| ENSMMUG00000009798 | CTCF        | CCCTC-binding factor (zinc finger protein)                         | 19.162       |
| ENSMMUG00000005164 | OR10Q1      | olfactory receptor, family 10, subfamily Q, member 1               | 11.052       |
| ENSMMUG00000009612 | FAM71F1     | family with sequence similarity 71, member F1                      | 6.724        |
| ENSMMUG00000014579 | PCDHB4      | protocadherin beta 4                                               | 4.461        |
| ENSMMUG00000021089 | SFRP4       | secreted frizzled-related protein 4                                | 12.528       |
| ENSMMUG00000006527 | CALD1       | caldesmon 1                                                        | 9.281        |
| ENSMMUG00000019291 | DPYSL3      | dihydropyrimidinase-like 3                                         | 2.848        |
| ENSMMUG00000003061 | CCDC80      | coiled-coil domain containing 80                                   | 9.132        |
| ENSMMUG00000004127 | SHFM1       | split hand/foot malformation (ectrodactyly) type 1                 | 36.361       |
| ENSMMUG00000000290 | RBP1        | retinol binding protein 1, cellular                                | 22.301       |
| ENSMMUG00000014782 | STC2        | stanniocalcin 2                                                    | 13.435       |
| ENSMMUG00000009953 | NINL        | ninein-like                                                        | 3.464        |
| ENSMMUG00000016040 | RND3        | Rho family GTPase 3                                                | 5.111        |
| ENSMMUG00000012321 | FN1         | fibronectin 1                                                      | 8.505        |
| ENSMMUG00000005225 | GJA1        | gap junction protein, alpha 1, 43kDa                               | 25.877       |
| ENSMMUG00000004389 | CDH18       | cadherin 18, type 2                                                | 8.644        |
| ENSMMUG00000017316 | PIM1        | pim-1 oncogene                                                     | 22.905       |
| ENSMMUG00000001484 | LAMP2       | lysosomal-associated membrane protein 2                            | 22.823       |
| ENSMMUG00000000123 | NHSL1       | NHS-like 1                                                         | 9.043        |
| ENSMMUG00000014009 | TPM4        | tropomyosin 4                                                      | 137.561      |
| ENSMMUG00000028834 | SF4         | splicing factor 4                                                  | 30.442       |
| ENSMMUG00000000706 | FLNB        | filamin B, beta (actin binding protein 278)                        | 11.341       |
| ENSMMUG00000013825 | ATP6V0E1    | ATPase, H <sup>+</sup> transporting, lysosomal 9kDa, V0 subunit e1 | 216.389      |
| ENSMMUG00000010155 | PRPF38B     | PRP38 pre-mRNA processing factor 38 (yeast) domain containing B    | 104.933      |
| ENSMMUG00000022456 | JAZF1       | JAZF zinc finger 1                                                 | 8.506        |
| ENSMMUG00000009172 | MUC2        | mucin 2, oligomeric mucus/gel-forming                              | 41.94        |
| ENSMMUG00000006026 | SH3D19      | SH3 domain containing 19                                           | 2.419        |
| ENSMMUG00000023679 | TRIM26      | tripartite motif-containing 26                                     | 4.533        |
| ENSMMUG00000009084 | TM6SF1      | transmembrane 6 superfamily member 1                               | 2.304        |
| ENSMMUG00000013751 | OPN5        | opsin 5                                                            | 0.6          |
| ENSMMUG00000009479 | ASCC1       | activating signal cointegrator 1 complex subunit 1                 | 0.563        |
| ENSMMUG00000004305 | STK35       | serine/threonine kinase 35                                         | 0.723        |
| ENSMMUG00000019407 | RIMS2       | regulating synaptic membrane exocytosis 2                          | 0.139        |

|                    |                         |                                                            |       |
|--------------------|-------------------------|------------------------------------------------------------|-------|
| ENSMMUG00000030671 | Uncharacterized protein |                                                            | 0.41  |
| ENSMMUG00000019960 | DHX16                   | DEAH (Asp-Glu-Ala-His) box polypeptide 16                  | 0.013 |
| ENSMMUG00000019634 | RRP12                   | ribosomal RNA processing 12 homolog (S. cerevisiae)        | 0.01  |
| ENSMMUG00000005144 | NEK11                   | NIMA (never in mitosis gene a)- related kinase 11          | 0     |
| ENSMMUG00000009515 | CBLN3                   | cerebellin 3 precursor                                     | 0     |
| ENSMMUG00000015707 | PDGFRA                  | platelet-derived growth factor receptor, alpha polypeptide | 0     |
